# Supplementary material for: Treatment interventions for hand fractures and joint injuries: a scoping review of randomized controlled trials
Source: PubMed Central journal article supplement — J Hand Surg Eur Vol. 2019 Aug 5;45(2):111–8. doi: 10.1177/1753193419865897 (PMC6974775; doi:10.1177/1753193419865897), 2019-08-05
Supplement: Supplemental_Material1.pdf [file Supplemental_Material1.pdf]

## APPENDIX 1

1  
2  
3  
4  
5  
6  
7  
8  
9  
10  
11  
12  
13  
14  
15  
16  
17  
18  
19  
20  
21  
22

### Search strategies for the scoping review

#### 1. Hand terms

- a. ("Hand bones"[MeSH] OR "Hand joints"[MeSH]
- b. OR "Carpal bones"[MeSH] OR carpals OR carpo OR carpus[tw] OR carpocarpal OR intracarpal OR mediocarpal OR mesocarpal OR midcarpal OR transcarpal
- c. OR carpometacarpal OR CMC
- d. OR "Metacarpal bones"[MeSH] OR metacarpus OR metacarpal OR metacarpals OR metacarpo\* OR midmetacarpal OR transmetacarpal
- e. OR thumb OR thumbs OR thenar
- f. OR "Scaphoid bone"[MeSH] OR scaphoid OR scaphoids OR scaphoidal OR hemiscaphoid OR medioscaphoid OR mesoscaphoid OR midscaphoid OR periscaphoid OR transscaphoid OR transscaphoidal
- g. OR "Lunate bone"[MeSH] OR lunate OR lunates OR hemilunate OR mediolunate OR mesolunate OR midlunate OR perilunate OR perilunar OR "semilunar bone" OR translunate
- h. OR "Pisiform bone"[MeSH] OR pisiform OR hemipisiform OR mediopisiform OR mesopisiform OR midpisiform OR peripisiform OR transpisiform
- i. OR "Triquetrum bone"[MeSH] OR triquetrum OR triquetral OR hemitriquetral OR mediotriquetral OR mesotriquetral OR midtriquetral OR peritriquetral OR transtriquetrum OR transtriquetral

- 23 j. OR "Trapezium bone"[MeSH] OR trapezium OR trapeziums OR trapezial OR hemitrapezium  
24 OR mediotrapezium OR mesotrapezium OR midtrapezium OR pantrapezial OR  
25 peritrapezium OR peritrapezial OR transtrapezium OR transtrapezial
- 26 k. OR "Trapezoid bone"[MeSH] OR trapezoid OR trapezoids OR hemitrapezoid OR  
27 mediotrapezoid OR mesotrapezoid OR midtrapezoid OR pantrapezoid OR peritrapezoid OR  
28 peritrapezoidal OR transtrapezoid
- 29 l. OR "Capitate bone"[MeSH] OR capitate OR hemicapitate OR mediocapitate OR  
30 mesocapitate OR midcapitate OR pericapitate OR transcapitate
- 31 m. OR "Hamate bone"[MeSH] OR hamate OR hamates OR hemihamate OR mediohamate OR  
32 mesohamate OR midhamate OR perihamate OR transhamate
- 33 n. OR sesamoid OR sesamoids OR sesamoidal
- 34 o. OR "Finger phalanges"[MeSH] OR finger OR fingers OR phalanx OR phalangeal OR phalanxes  
35 OR phalanges OR midphalangeal OR transphalangeal
- 36 p. OR ((Joints[MeSH] OR joint OR joints) AND (carpometacarpal OR metacarpophalangeal OR  
37 interphalangeal))
- 38 q. OR ((Ligaments[MeSH] Or ligament OR ligaments) AND (beak OR capitolunate OR  
39 capitolute OR "central slip" OR "central slips" OR "extensor expansion" OR "extensor  
40 expansions" OR "extensor hood" OR "expansion hood" OR "extensor retinaculum" OR  
41 "deep transverse metacarpal" OR "dorsal intercarpal" OR "lateral band" OR "lateral bands" "  
42 OR lunotriquetral OR "lunotriquetral interosseous" OR natatory OR pisohamate OR  
43 pisometacarpal OR radiocapitate OR radiocarpal OR radiolunate OR radiolunotriquetral OR  
44 radioscaploid OR radioscaplocapitate OR radioscapholunate OR radiotriquetral OR "radial  
45 collateral" OR retinacular " OR "ulnar collateral" OR radiopalmar OR "sagittal band" OR  
46 "sagittal bands" OR scaphocapitate OR scapholunate OR "scapholunate interosseous" OR  
47 scaphotrapezial OR scaphotrapezoid OR scaphotrapeziotrapezoid OR "superficial transverse

48 metacarpal" OR trapeziocapitate OR trapezotrapezoid OR triquetralcapitate OR  
49 triquetralhamate OR triquetrocipitate OR ulnocarpal OR ulnocapitate OR ulnolunate OR  
50 ulnotriquetral))

51 r. OR "Collateral ligament, ulnar" [MeSH]

52 s. OR Testut[tw] OR Kuentz[tw] OR "Space of Poirier" OR "volar plate"

53 t. OR Barton[tw] OR Barton's OR Bennett[tw] or Bennett's OR Boxer OR Boxer's OR  
54 Chauffeur[tw] OR Chauffeur's OR Colles[tw] OR Colles' OR Colles's OR diepunch OR "die-  
55 punch" OR FOOSH OR "Jersey finger" OR Mallet OR Rolando[tw] OR Rolando's OR Smith[tw]  
56 OR Smith's)

## 57 2. Fracture and ligament injury terms

58 a. (dislocation OR dislocations OR extraarticular OR "extra-articular" OR fracture[tw] OR  
59 fractures[tw] OR "Fractures, bone" [MeSH] OR "Fractures, cartilage" [MeSH] OR "Fracture  
60 healing" [MeSH] OR injury OR injuries OR injuries[subheading] OR intraarticular OR "intra-  
61 articular" OR rupture OR ruptures OR sprain OR sprains)

## 62 3. Specific hand fracture/injury terms.

63 a. ("wrist fracture" OR "wrist fractures" OR "hand fracture" OR "hand fractures" OR  
64 (carpometacarpal AND dislocation) OR "digital fracture" OR "digital fractures" OR "carpal  
65 fractures" OR "carpal fractures" OR "carpal dislocation" OR "carpal dislocations" OR  
66 "gamekeepers thumb" OR "gamekeeper's thumb" OR ("proximal interphalangeal" AND  
67 dislocation) OR (("radius fracture" OR "radial fracture" OR "radius fractures" OR "radial  
68 fractures") AND distal) OR "skier's injury" OR "skier's thumb" OR "stener's lesion" OR  
69 "stener lesion" OR (stener AND lesion))

70 4. 1 AND 2

71 5. 3 OR 4

72

73

74

75

76
