# Supplementary material for: Treatment interventions for hand fractures and joint injuries: a scoping review of randomized controlled trials
Source: PubMed Central journal article supplement — J Hand Surg Eur Vol. 2019 Aug 5;45(2):111–8. doi: 10.1177/1753193419865897 (PMC6974775; doi:10.1177/1753193419865897), 2019-08-05
Supplement: Supplemental_Material3.pdf [file Supplemental_Material3.pdf]

|                            | Random sequence generation (selection bias) | Allocation concealment (selection bias) | Blinding of participants and personnel (performance bias) | Blinding of outcome assessment (detection bias) | Incomplete outcome data (attrition bias) | Selective reporting (reporting bias) |
|----------------------------|---------------------------------------------|-----------------------------------------|-----------------------------------------------------------|-------------------------------------------------|------------------------------------------|--------------------------------------|
| 1982 Auchincloss et al.    | ?                                           | ?                                       | ?                                                         | ?                                               | ?                                        | ?                                    |
| 1986 Kinninmonth et al.    | ?                                           | ?                                       | ?                                                         | ?                                               | ●                                        | ?                                    |
| 1987 Norregaard et al.     | ●                                           | ?                                       | ?                                                         | ?                                               | ●                                        | ?                                    |
| 1987 Sloan et al.          | ?                                           | ?                                       | ?                                                         | ?                                               | +                                        | ?                                    |
| 1988 Sjolín et al.         | ?                                           | ?                                       | ?                                                         | ?                                               | ?                                        | ?                                    |
| 1988 Warren et al.         | ●                                           | ●                                       | ?                                                         | ?                                               | +                                        | ?                                    |
| 1989 Gellman et al.        | ●                                           | ?                                       | ?                                                         | ?                                               | +                                        | ?                                    |
| 1990 Konradsen et al.      | ?                                           | ?                                       | ?                                                         | ?                                               | +                                        | ●                                    |
| 1991 Clay et al.           | ?                                           | ?                                       | ?                                                         | ?                                               | ●                                        | ?                                    |
| 1991 Sollerman et al.      | +                                           | ?                                       | ?                                                         | ?                                               | +                                        | ?                                    |
| 1992 Randall et al.        | ?                                           | ?                                       | ?                                                         | +                                               | +                                        | ?                                    |
| 1993 Sorensen et al.       | ?                                           | ?                                       | ?                                                         | ?                                               | ●                                        | ?                                    |
| 1994 McMahon et al.        | ?                                           | +                                       | ?                                                         | ?                                               | +                                        | ?                                    |
| 1995 Hambridge et al.      | ?                                           | ?                                       | ?                                                         | ?                                               | ?                                        | ?                                    |
| 1995 Pedersen et al.       | ?                                           | ?                                       | ?                                                         | ?                                               | +                                        | ?                                    |
| 1995 Sourmelis et al.      | ?                                           | ?                                       | ?                                                         | ?                                               | +                                        | ?                                    |
| 1995 Thomsen et al.        | ?                                           | ?                                       | ?                                                         | ?                                               | +                                        | ?                                    |
| 1996 Garramone et al.      | ?                                           | ?                                       | ?                                                         | ?                                               | +                                        | ?                                    |
| 1998 Braakman et al.       | ?                                           | ?                                       | ?                                                         | ?                                               | +                                        | ?                                    |
| 1998 Hansen et al.         | ?                                           | ?                                       | ?                                                         | ?                                               | ?                                        | ?                                    |
| 1999 Anand et al.          | ●                                           | ●                                       | ?                                                         | ?                                               | ?                                        | ●                                    |
| 1999 Kuokkanen et al.      | ?                                           | ?                                       | ?                                                         | ?                                               | +                                        | ?                                    |
| 2000 Mayr et al.           | ?                                           | ?                                       | ?                                                         | +                                               | ?                                        | ?                                    |
| 2001 Adolfsson et al.      | ?                                           | ?                                       | ?                                                         | ?                                               | ●                                        | ?                                    |
| 2001 Bond et al.           | ?                                           | ?                                       | ?                                                         | ?                                               | +                                        | ?                                    |
| 2001 Harding et al.        | ?                                           | ?                                       | ?                                                         | ?                                               | ?                                        | ?                                    |
| 2001 Saeden et al.         | ?                                           | ?                                       | ?                                                         | ?                                               | ?                                        | ?                                    |
| 2002 Gaebler et al.        | ?                                           | ?                                       | ?                                                         | ?                                               | +                                        | ?                                    |
| 2003 Horton et al.         | ?                                           | ?                                       | ?                                                         | ?                                               | ?                                        | ?                                    |
| 2003 Status Muller et al.  | ?                                           | +                                       | ?                                                         | ?                                               | ?                                        | ?                                    |
| 2003 Stevenson et al.      | +                                           | +                                       | +                                                         | +                                               | +                                        | ?                                    |
| 2004 Arora et al.          | ?                                           | ?                                       | ?                                                         | ?                                               | ●                                        | ?                                    |
| 2005 Dias et al.           | +                                           | +                                       | ?                                                         | ?                                               | +                                        | ?                                    |
| 2006 Bilic et al.          | +                                           | ?                                       | +                                                         | +                                               | +                                        | ?                                    |
| 2006 Rafique et al.        | ?                                           | ?                                       | ?                                                         | ?                                               | +                                        | ?                                    |
| 2006 Ricardo et al.        | ?                                           | ?                                       | +                                                         | +                                               | +                                        | ?                                    |
| 2007 Lawton et al.         | ?                                           | ?                                       | ?                                                         | +                                               | +                                        | ?                                    |
| 2007 Winter et al.         | +                                           | ●                                       | ?                                                         | ?                                               | +                                        | ?                                    |
| 2008 Braga-Silva et al.    | ?                                           | +                                       | ?                                                         | ?                                               | +                                        | ?                                    |
| 2008 Dias et al.           | ?                                           | ?                                       | ?                                                         | ?                                               | ●                                        | ?                                    |
| 2008 Hofmeister et al.     | +                                           | ●                                       | ?                                                         | +                                               | +                                        | ?                                    |
| 2008 McQueen et al.        | ?                                           | +                                       | ?                                                         | +                                               | ?                                        | ?                                    |
| 2008 Vinnars et al.        | +                                           | ?                                       | ?                                                         | ?                                               | +                                        | ?                                    |
| 2008 Zhou et al.           | +                                           | ?                                       | ?                                                         | ?                                               | +                                        | ?                                    |
| 2009 Boisgontier et al.    | +                                           | ?                                       | ?                                                         | ●                                               | +                                        | ?                                    |
| 2009 Zyluk et al.          | +                                           | ●                                       | ?                                                         | ?                                               | ●                                        | ?                                    |
| 2010 Pike et al.           | +                                           | ?                                       | ?                                                         | +                                               | ●                                        | ●                                    |
| 2010 Ribak et al.          | ●                                           | ?                                       | ?                                                         | ?                                               | +                                        | ?                                    |
| 2010 Strub et al.          | ●                                           | ●                                       | ?                                                         | ?                                               | +                                        | ?                                    |
| 2011 O'Brien et al.        | +                                           | +                                       | ?                                                         | +                                               | ●                                        | +                                    |
| 2011 Raju et al.           | ?                                           | ?                                       | ?                                                         | ?                                               | +                                        | ?                                    |
| 2012 Franz et al.          | ●                                           | ●                                       | ?                                                         | ?                                               | +                                        | ?                                    |
| 2012 Hannemann et al.      | +                                           | +                                       | +                                                         | ?                                               | +                                        | ?                                    |
| 2013 Goyal et al.          | +                                           | ?                                       | ?                                                         | ?                                               | ?                                        | ?                                    |
| 2013 Tocco et al.          | +                                           | +                                       | ?                                                         | ?                                               | ?                                        | ?                                    |
| 2014 Buijze et al.         | +                                           | ?                                       | ?                                                         | +                                               | ?                                        | ?                                    |
| 2014 Caporrino et al.      | ?                                           | +                                       | ?                                                         | ?                                               | +                                        | ?                                    |
| 2014 Chang et al.          | ?                                           | ?                                       | +                                                         | +                                               | +                                        | ?                                    |
| 2014 Drac et al.           | ●                                           | ?                                       | ?                                                         | ?                                               | +                                        | ?                                    |
| 2014 Gruber et al.         | +                                           | ?                                       | ?                                                         | ?                                               | ●                                        | ?                                    |
| 2014 Hannemann et al.      | +                                           | ?                                       | +                                                         | +                                               | ?                                        | ?                                    |
| 2014 Moineau et al.        | ?                                           | ?                                       | ?                                                         | +                                               | +                                        | ?                                    |
| 2014 Rocchi et al.         | ?                                           | ?                                       | ?                                                         | +                                               | +                                        | ?                                    |
| 2015 Clementson et al. (1) | ?                                           | ?                                       | ?                                                         | ?                                               | ●                                        | ?                                    |
| 2015 Clementson et al. (2) | ?                                           | ?                                       | ?                                                         | ?                                               | +                                        | ?                                    |
| 2015 Kim et al.            | +                                           | ?                                       | ?                                                         | ?                                               | ?                                        | ?                                    |
| 2015 Sletten et al.        | ●                                           | +                                       | ?                                                         | ●                                               | +                                        | ?                                    |
| 2015 Xia et al.            | +                                           | ?                                       | ?                                                         | ?                                               | +                                        | ?                                    |
| 2016 Abubeih et al.        | ?                                           | ?                                       | ?                                                         | ?                                               | +                                        | ?                                    |
| 2016 Cepni et al.          | ?                                           | ?                                       | ?                                                         | ?                                               | ?                                        | ●                                    |
| 2016 Kappos et al.         | +                                           | ?                                       | +                                                         | +                                               | ?                                        | ?                                    |
| 2016 Miller et al.         | +                                           | +                                       | ?                                                         | +                                               | ●                                        | ?                                    |
| 2016 Saito et al.          | +                                           | +                                       | ?                                                         | +                                               | +                                        | ?                                    |
| 2016 Van Aaken et al.      | ●                                           | ?                                       | +                                                         | +                                               | +                                        | ?                                    |
| 2017 Batibay et al.        | ?                                           | +                                       | ?                                                         | ?                                               | +                                        | ●                                    |
| 2017 Galal et al.          | ?                                           | ?                                       | ?                                                         | +                                               | ●                                        | ?                                    |
| 2017 Gulke et al.          | +                                           | ●                                       | ●                                                         | ●                                               | +                                        | ?                                    |
| 2017 Lyons et al.          | ?                                           | ?                                       | ?                                                         | ?                                               | +                                        | ?                                    |
